# Supplementary material for: Regulators Associated with Clinical Outcomes Revealed by DNA Methylation Data in Breast Cancer
Source: PubMed Central journal article supplement (PMC4440643; doi:10.1371/journal.pcbi.1004269), 2015-05-21
Supplement: pcbi.1004269.s013.pdf [file pcbi.1004269.s013.pdf]

| Breast Cancer Subtype | Enriched (P≤0.01) |           |          | Depleted (P≤0.01) |           |           |
|-----------------------|-------------------|-----------|----------|-------------------|-----------|-----------|
| Histological Subtypes | Protective        | Hazardous | Pro+Haz  | Protective        | Hazardous | Pro+Haz   |
| Triple-positive       | 46 (30)           | 43 (27)   | 40 (26)  | 143 (98)          | 0 (0)     | 72 (54)   |
| Triple-negative       | 41 (26)           | 0 (0)     | 14 (11)  | 12 (11)           | 0 (0)     | 1 (1)     |
| PR+                   | 69 (53)           | 32 (25)   | 37 (30)  | 135 (92)          | 0 (0)     | 106 (78)  |
| PR-                   | 116 (76)          | 30 (19)   | 128 (83) | 129 (95)          | 0 (0)     | 135 (98)  |
| HER+                  | 36 (26)           | 106 (62)  | 67 (47)  | 54 (41)           | 15 (14)   | 61 (46)   |
| HER-                  | 91 (62)           | 32 (22)   | 89 (59)  | 117 (85)          | 2 (2)     | 76 (59)   |
| ER+                   | 102 (77)          | 99 (62)   | 80 (60)  | 161 (113)         | 7 (6)     | 150 (103) |
| ER-                   | 69 (49)           | 14 (11)   | 10 (8)   | 21 (19)           | 28 (22)   | 14 (13)   |
| Intrinsic Subtypes    |                   |           |          |                   |           |           |
| Basal                 | 0 (0)             | 26 (16)   | 6 (4)    | 1 (1)             | 2 (2)     | 0 (0)     |
| HER2-enriched         | 0 (0)             | 0 (0)     | 0 (0)    | 0 (0)             | 0 (0)     | 0 (0)     |
| Luminal A             | 9 (6)             | 119 (72)  | 102 (61) | 13 (11)           | 29 (25)   | 40 (34)   |
| Luminal B             | 0 (0)             | 64 (42)   | 5 (4)    | 7 (5)             | 0 (0)     | 0 (0)     |
